# Supplementary material for: Empowering Orthopedic Nurses’ and Nurse’s aides through a Multimodal Geriatric Mobile Team: a Mixed Methods Study
Source: Research Square preprint supplement (doi:10.21203/rs.3.rs-6312750/v1), 2025-05-13
Supplement: Supplementary file 1 [file 01dbaea65068aae54b3be262.docx]

**SUPPLEMENTARY MATERIALS**

**Supplemental S1:** Mixed Methods Reporting in Rehabilitation & Health Sciences (MMR-RHS)

**Supplemental S2:** “Aging simulation” workshop program and details

**Supplemental S3:** “Room of errors” workshop program and details

**Supplemental S4:** Mobile team training course program

**Supplemental S5:** Semi-structured interview guide for focus groups

**Supplemental S1: Mixed Methods Reporting in Rehabilitation & Health Sciences (MMR-RHS)**

| **No.** | **Item** | **Yes/No** | **Page (or NA)** |
| --- | --- | --- | --- |
| **Title** | | | |
| 1 | Concisely describes the topic of the study identifying the study as mixed methods | Yes | 1 |
| **Abstract** | | | |
| 2 | Summarizes key elements using journal specific abstract format; For example: Introduction, Methods, Results, Discussion, and Significance/potential impact to rehabilitation and/or societal health | Yes | 2 |
| **Introduction** | | | |
| 3 | Includes literature review on the topic of interest (quantitative, qualitative, and mixed) | Yes | 4-6 |
| 4 | *Identifies gap that justifies the need for mixed methods approach* | Yes | 4-6 |
| 5 | Clearly states overarching goal of the study that supports a mixed methods approach | Yes | 6 |
| 6 | *States the rationale for using mixed methods research* | Yes | 6 |
| 7 | Clearly identifies discrete aim(s) for qualitative and quantitative components Aims align with corresponding component methods | Yes | 6 |
| 8 | Provides statement of significance and potential impact | Yes | 6 |
| **Methods** | | | |
| 9 | **Design** – *Clearly describes the mixed methods design* (exploratory sequential, explanatory sequential, concurrent, etc.) used to accomplish the overarching goal of the project:   - *Emphasis noted* (i.e., Sequential QUAL--> quan or QUAN--> qual; Concurrent QUAL + QUAN) - *Visual display of overall design highlighting integration* (e.g., model, flow chart, figure) | Yes | 7 |
| 10 | Describes and supports the qualitative and quantitative methodologies (phenomenology, randomized control trial) used to accomplish the discrete aim(s) of the project | Yes | 7 |
| 11 | States researcher(s) background and contributions to project (e.g. content or methods expertise, relationships to participants) | Yes | 8 |
| 12 | Identifies setting (e.g. hospital system, geographical location) | Yes | 8 |
| 13 | **Subjects/Participants** – Clearly describes and supports the following:   - Sampling and recruitment - Inclusion/Exclusion criteria - Ethical considerations (consent process, researcher relationship with participants) | Yes | 7 |
| 14 | **Data collection -** Clearly describes and supports the following:   - Pilot study (if applicable) - Instrumentation (validity, reliability) - Implementation matrix (e.g. data source, timeline, type, anticipated outcomes) | Yes | 8-10 |
| 15 | **Data analysis -** Clearly states and describes analysis procedures for:   - Qualitative - Quantitative - *Mixed Methods (integration)* | Yes | 10-11 |
|  |  |  |  |

*Tovin et Wormley, « Systematic Development of Standards for Mixed Methods Reporting in Rehabilitation Health Sciences Research ».*

**Supplemental S1: Mixed Methods Reporting in Rehabilitation & Health Sciences (MMR-RHS)**

| **No.** | **Item** | **Yes/No** | **Page (or NA)** |
| --- | --- | --- | --- |
| **Methods** | | | |
| 16 | **Methodological Rigor** – Clearly describes steps taken to establish rigor:   - Qualitative (e.g. credibility, dependability, confirmability, transferability) - Quantitative (e.g. validity, reliability, generalizability) - Mixed Methods (validity or legitimacy) | Yes | 7-11 |
| **Results/Findings** | | | |
| 17 | Clearly presents findings for study components:   - Qualitative (includes data exemplars) - Quantitative - *Mixed Methods-Provides integrated findings/overall study results (e.g., joint display)* | Yes | 12-15 |
| **Discussion** | | | |
| 18 | *Incorporates discussion on implications of integrated findings* | Yes | 16-18 |
| 19 | Provides synthesis and interpretation of findings in the context of existing literature and theoretical/conceptual framework | Yes | 16-17 |
| 20 | Includes subsection of limitations | Yes | 17-18 |
|  |  |  |  |

*Tovin et Wormley, « Systematic Development of Standards for Mixed Methods Reporting in Rehabilitation Health Sciences Research ».*

**Supplemental S2: “Aging simulation” workshop program and details**

The Ageing Simulation Costume serves as a tool to increase awareness of the sensory and motor challenges experienced by older individuals. In the workshop, participants wearing the suit will complete fundamental activities of daily living. The educational value and indirect contribution of the workshop to improving the quality of care have been demonstrated.[1–3]

Aim of the workshop: (1) Providing the user with an explanation of the disabilities being simulated; (2) Encouraging the user to wear the suit in everyday situations; (3) Assisting the user with the removal of the suit

Costume composition:

| **Suit parts** | **Materialized disability** |
| --- | --- |
| Hearing helmets with earplugs | Hearing loss |
| Pair of glasses | Various visual disorders |
| Gloves + mittens | Loss of sensitivity, joint limitation |
| Elbow support | Joint limitation |
| Knee support | Joint limitation |
| Ankle weights | Sarcopenia |
| Overshoes | Balance disorders |
| Weight vest | Sarcopenia |
| Cervical collar | Joint limitation |
| Wrist weight | Sarcopenia |

Workshop’s scenario:

- Answering questions while walking

- Passing an obstacle on the ground

- Picking up blister-packed medication from the ground

- Sitting down and getting up from a chair

- Lying down in bed/getting up from bed

- Getting in and out of a toilet

- Pouring a glass of water

- Taking medication from pillbox/taking medication from table

- Reading a prescription

- Writing a sentence

Below are a picture of the simulation costume and bibliographic references regarding its usefulness

Aging simulation costume offered by GERT company:

[*https://www.simulateur-du-vieillissement.com/notre-original.html*](https://www.simulateur-du-vieillissement.com/notre-original.html)

*
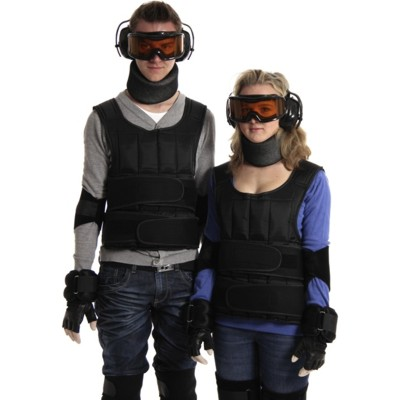
*

References:

1 Gerhardy TH, Schlomann A, Wahl H-W, *et al.* Effects of age simulation suits on psychological and physical outcomes: a systematic review. *Eur J Ageing*. 2022;19:953–76. doi: 10.1007/s10433-022-00722-1

2 Romane DORE, Ingrid BOURGOGNE, Claire PATRY, Clotilde MONNET, Anaïs CLOPPET-FONTAINE. Le costume de simulation du grand âge comme outil pédagogique pour des pratiques de soins bientraitantes : expériences croisées d’une équipe mobile de gériatrie et d’un gérontopôle, La Revue de Gériatrie, décembre 2021.

3 Akpınar Söylemez B, Özgül E, Akyol MA, *et al.* Effectiveness of the aged simulation suit on undergraduate nursing students’ attitudes and empathy toward older adults: A systematic review and meta-analysis. *Nurse Educ Pract*. 2024;77:103990. doi: 10.1016/j.nepr.2024.103990

**Supplemental S3: “Room of errors” workshop program and details**

The error room serves as an educational tool aimed at increasing caregivers' awareness of the potential risk of iatrogenic dependency in hospitalized older patients. Caregivers are tasked with individually identifying various errors and risks intentionally arranged by trainers in a hospital room. A collective debriefing session follows the conclusion of the exercise. This exercise was strongly inspired by French National Authority for Health (HAS) recommendations.

Course of the Workshop:

(1) Fourteen errors are pre-set in the room by the trainers

(2) The rules of the exercise are explained to caregivers, along with the patient profile "installed in the room."

(3) Caregivers enter the room individually with a trainer. The trainer records the errors identified by the caregiver on the record sheet

(4) A group debriefing session is conducted to discuss the errors identified by the caregivers, with a focus on identifying corrective actions to be taken.

Workshop scenario:

- **Patient**: An 84-year-old individual admitted for hip prosthesis surgery, now hospitalized for 24 hours.
- **Lifestyle**: Widowed two decades ago, with two children residing elsewhere. Resides alone in an apartment. Generally independent in activities of daily living (ADL score = 5.5/6) but walks with a cane. Continent but requires assistance with instrumental activities such as shopping, home maintenance, and budget management (receives home help once a week and support from children). Also, receives home nursing assistance weekly for medication preparation.
- **Medical history**: Experienced a fall at home resulting in a prolonged period on the ground. No head trauma or loss of consciousness noted. Diagnosis includes a fracture requiring surgery for a total hip prosthesis, with authorized support. Suspected post-fall syndrome.

**Current room situation**: It's noon, and the patient is confined to bed with two bed rails up and wrist restraints in place, although the individual expresses a desire to get up.

Below is a table summarizing the list of errors as well as advice for the debriefing and recommendations following the workshop.

| **Errors** | **Debriefing / recommendations** |
| --- | --- |
| **Patient in bed** | - Daily chair positioning - Prevention of the risk of psychomotor maladjustment - Prevention of bedsore risk |
| **Barriers raised** | - Necessary? - Medical prescription? - Risk of falling? - Patient continent. Risk of urinary incontinence - Confusing, confines patient - Suggest half-barrier to patient   If restraint necessary => prefer pelvic restraint to chair restraint |
| **Wrist restraints for patients wishing to stand up** | - Indication? Contention not adapted to risks - Medical prescription? - Prefer pelvic chair restraint |
| **Bed too high** | - Risk of falls - Risk of musculoskeletal disorders for caregivers |
| **Unbraked bed** | - Risk of falls/bed systematically braked |
| **Table away from the patient (water glass and personal belongings not accessible)** | - Making the table accessible - Personal belongings available |
| **Bell away from patient** | - Making the bell accessible |
| **Water puddle on bathroom floor** | - Risk of caregiver/patient falling - Wipe up water and remove used "mop" |
| **No light in the room (blinds closed, light off)** | - Confusing - Risk of reversal of nycthemeral rhythm - Risk of falling - Open blinds, facilitate access to light, if night light... |
| **Unopened and untaken medication on adaptor** | - Older person with fine motor disorders + visual disorders - Risk of error - Remove medication from packaging, explain, supervise and assist in taking it |
| **Tap shoes** | - Risk of falling (unsuitable) - Prefer non-slip socks |
| **Pelvic restraint with sheets** | - On prescription and under supervision - Careful installation - Medical device => approved pelvic restraint (vs. wrist restraint) |
| **Walking aids away from patient** | - Making the walking aid accessible |
| **Glass with spout** | - Using the glass with spout and/or straw - Use of a normal glass (not the glass with spout) - No straw unless specifically indicated - Still water test => reminder of instructions |

**Supplemental S4:** **Mobile Team Training Course Program**

These courses were developed in alignment with the recommendations provided by the French HAS regarding Hospital-Associated Disability in Older Adults. Each course focused on a specific aspect of this concept, such as delirium, undernutrition, intra-hospital falls, incontinence, misuse of treatments, and immobilization syndrome. The speakers or reviewers involved in these courses included physicians (e.g., BG, JCB, or EM), a physiotherapist (MN), a nurse (CT), and an occupational therapist (LB).

**1st Course: Misuse, Overuse or Underuse of treatments in the older orthopedic patient**

Speakers: JCB & BG, Proofreaders: CT & EM

**2nd Course: Preventing immobilization syndrome in older orthopedic patient**

Speakers: CT, LB & MN, Proofreaders: JCB & BG

**3rd Course: Assessing risk and preventing falls in older orthopedic patient**

Speakers: CT, LB & MN, Proofreaders: JCB & BG

**4th Course: Detecting and managing delirium and agitation in the older orthopedic patient**

Speakers: CT, LB & BG, Proofreaders: JCB & BG

**5th Course: Assessing continence and preventing incontinence induced by orthopedic hospitalization in older patients**

Speakers: CT, LB & BG, Proofreaders: JCB & BG

**6th Course: Identifying and preventing undernutrition in older orthopedic patients**

Speakers: CT & LB, Proofreaders: JCB & BG

**Supplemental S5:** **Semi-structured interview guide for focus groups**

**First Question: Tell us about the last time you cared for an older patient in our department.**

Relaunch: How did it feel? What did you do?

**Second Question: What changes would you make in your care of an older patient?**

Relaunch: If you do not change anything, what do you think is important in yourcare of orthopedic patients?

**Third Question: What did you expect from the introduction of our mobile team in your department? What did you think of it?**

**Fourth Question: What links have you had with the mobile team?**

Relaunch: How have you benefited from the mobile team courses/workshops? Daily visits?

**Fifth Question: What are the specific roles of you or your team and the mobile team in patient care?**

**Sixth Question: If you yourself were a member of the mobile team, how would you organize your involvement with the orthopedic team and patients?**
